# Supplementary material
Source: publisher site journal article supplement (https://subtbiol.pensoft.net/article/76926/download/suppl/32/)
Supplement: Supplementary file 1

## Sheet: Table S1
Table S1. Primers used for amplification and sequencing of the COI, 16S and 28S
Markers	Primer name	Sequence (5’-3’)	Source	Sequence size
COI	LCO1490	WYTCDACWAAYCRYAARGAYATYGG	Zhang et al. (2014)	658
	HCO2198	TAN ACY TCN GGR TGN CCR AAR AAT CA
16S	16SAcoll	MGMMTGTTTAWCAAAAACAT	Schneider et al. (2011)	472–495
	16SBcoll	CGCCGGTTTGAACTCAAATCA
	LR-J-12887	CCGGTCTGAACTCAAATCATGT	Simon et al. (1994)
	LR-N-13398M	CGACTGTTTAACAAAAACAT	Zhang et al (2014)
28S	28SrD1-2a	CCCSSGTAATTTAAGCATATTA	Whiting (2002)	741–763
	28Sbout	CCCACAGCGCCAGTTCTGCTTACC	Giribet et al. (2001)

## Sheet: Table S2
Table S2. Inter/intraspecific genetic divergences for COI, 16S and 28S markers; Abbreviations for the code of four new species: KKN03, Coecobrya troglobia sp. n.; KKN04, C. whitteni sp. n.; PNB, C. ellisi sp. n.; PLK01, C. phitsanulokensis sp. n..
Gene Marker	Individuals
COI		KKN035	KKN036	KKN037	KKN044	KKN045	KKN046	KKN047	PNB067	PNB068	PNB069
	KKN035
	KKN036	0.01
	KKN037	0.02	0.01
	KKN044	0.113	0.111	0.114
	KKN045	0.113	0.111	0.114	0.005
	KKN046	0.106	0.105	0.108	0.015	0.01
	KKN047	0.108	0.105	0.108	0.02	0.016	0.02
	PNB067	0.216	0.209	0.209	0.219	0.219	0.212	0.214
	PNB068	0.232	0.226	0.227	0.237	0.237	0.23	0.234	0.036
	PNB069	0.224	0.221	0.222	0.23	0.23	0.224	0.225	0.023	0.023
16S		KKN035	KKN036	KKN037	KKN044	KKN045	KKN047	PNB061	PNB062	PNB063	PNB064	PNB065	PNB066	PLK012
	KKN035
	KKN036	0.134
	KKN037	0.131	0.141
	KKN044	0.329	0.322	0.304
	KKN045	0.35	0.348	0.344	0.203
	KKN047	0.357	0.362	0.355	0.194	0.067
	PNB061	0.385	0.359	0.377	0.408	0.433	0.418
	PNB062	0.385	0.359	0.377	0.408	0.433	0.418	0
	PNB063	0.385	0.359	0.377	0.408	0.433	0.418	0	0
	PNB064	0.388	0.359	0.385	0.404	0.43	0.414	0.007	0.007	0.007
	PNB065	0.385	0.359	0.377	0.408	0.433	0.418	0	0	0	0.007
	PNB066	0.385	0.359	0.377	0.408	0.433	0.418	0	0	0	0.007	0
	PLK012	0.372	0.379	0.379	0.415	0.424	0.411	0.241	0.241	0.241	0.245	0.241	0.241
28S		KKN031	KKN032	KKN035	KKN037	KKN044	KKN045	KKN047	PNB063	PNB067	PNB068	PNB069	PLK012
	KKN031
	KKN032	0.009
	KKN035	0.082	0.075
	KKN037	0.007	0.013	0.075
	KKN044	0.328	0.333	0.358	0.324
	KKN045	0.234	0.24	0.273	0.231	0.134
	KKN047	0.285	0.29	0.318	0.281	0.114	0.131
	PNB063	0.093	0.095	0.138	0.088	0.362	0.267	0.326
	PNB067	0.086	0.086	0.139	0.079	0.36	0.265	0.322	0.045
	PNB068	0.086	0.086	0.139	0.079	0.358	0.265	0.32	0.041	0.004
	PNB069	0.079	0.079	0.134	0.071	0.352	0.258	0.315	0.043	0.009	0.009
	PLK012	0.153	0.153	0.171	0.148	0.368	0.276	0.319	0.17	0.174	0.174	0.167

## Sheet: Table S3
Table S3. The sequenced terminals, and Genbank accession numbers used in this study.
Species name	Voucher	Accession numbers
		COI	16S	28S
Coecobrya specusincola	NRT038	MF978035	MF978153	MF978093
C. specusincola	NRT039	MF978034	MF978154	MF978095
C. specusincola	NRT034	NRT034
C. specusincola	NRT036	NRT036
C. promdami	NRT017	MF977997	MF978110	MF978051
C. promdami	NRT016	MF977996	MF978109	MF978052
C. khromwanaramica	SNI021	MF978010	MF978125	MF978068
C. khromwanaramica	SNI022	MF978009	MF978126	MF978067
C. khaopaela	SNI0810	MF978045	MF978163	MF978104
C. khaopaela	SNI089	MF978044	MF978162	MF978103
C. khaopaela	SNI084	SNI084
C. khaopaela	SNI081	SNI081
C. donyoa	CPN01	MF978000	MF978116	MF978059
C. donyoa	CPN01	MF978001	MF978117	MF978058
C. ranongica	RNG011	MF978027	MF978145	MF978086
C. ranongica	RNG012	MF978028	MF978146	MF978087
C. phanthuratensis	SNI011	MF978019	MF978136	MF978079
C. phanthuratensis	SNI012	MF978020	MF978137	MF978078
C. phanthuratensis	SNI013	SNI013
C. phanthuratensis	SNI014	SNI014
C. ellisi sp. n.	PNB069	PNB069		PNB0691
C. ellisi sp. n.	PNB067	PNB067		PNB067
C. ellisi sp. n.	PNB068	PNB068		PNB068
C. ellisi sp. n.	PNB063		PNB063	PNB063
C. ellisi sp. n.	PNB066		PNB066	PNB069
C. ellisi sp. n.	PNB061		PNB061
C. ellisi sp. n.	PNB062		PNB062
C. ellisi sp. n.	PNB064		PNB064
C. ellisi sp. n.	PNB065		PNB065
C. troglobia sp. n.	KKN037	KKN037	KKN037	KKN037
C. troglobia sp. n.	KKN036	KKN036	KKN036
C. troglobia sp. n.	KKN035	KKN035	KKN035	KKN035
C. troglobia sp. n.	KKN031	KKN031		KKN031
C. troglobia sp. n.	KKN032	KKN032		KKN032
C. whitteni sp. n.	KKN047	KKN047	KKN047	KKN047
C. whitteni sp. n.	KKN046	KKN046
C. whitteni sp. n.	KKN045	KKN045	KKN045	KKN045
C. whitteni sp. n.	KKN044	KKN044	KKN044	KKN044
C. phitsanulokensis sp. n.	PLK012		PLK012	PLK012
C. chumphonensis	CPN083	CPN083
C. chumphonensis	CPN081	KY704919
C. chumphonensis	CPN082	KY704920
C. cf. polychaeta	STN151	KY704931
C. cf. polychaeta	STN152	KY704932
C. cf. polychaeta	STN153	KY704929
C. polychaeta	STN081	KY704926
C. polychaeta	STN082	KY704925
C. polychaeta	STN084	KY704921
C. polychaeta	STN083	KY704922
C. polychaeta	STN085	STN085
C. polychaeta	STN086	STN086
C. polychaeta	STN083	KY704923
Tomocerus fopingensis		KF592055	KF591885	KF591971
